# Supplementary material for: Spatio-seasonal modeling of the incidence rate of malaria in Mozambique
Source: PubMed Central journal article supplement (PMC2584655; doi:10.1186/1475-2875-7-228), 2008-10-31
Supplement: 1475-2875-7-228-S1.pdf [file 1475-2875-7-228-S1.pdf]

### Additional file 1:

We describe our model formulation in terms of the malaria data set. Thus, let  $n_{itsk}$  denote the sum of weeks at risk of the children in each neighbourhood  $i$  ( $i=1, \dots, 115$ ) during the period  $t$  ( $t=1,2,3$ ) and climate season  $s$  ( $s=1,2$ ) for a specific age group  $k$  ( $k=1,2$ ). We assume that the number of new malaria cases per week  $Y_{itsk}$  in each neighbourhood  $i$  during the period  $t$  and climate season  $s$  and age group  $k$  has a Poisson distribution with mean  $n_{itsk} \exp(\mu_{itsk})$ .

The non-spatial model is defined as:

$$\log(\mu_{itsk}) = \log(n_{itsk}) + \beta_0 + \beta_t + \beta_s + \beta_{ts} + \beta_k$$

where  $\beta_t$  is the effect of period  $t$ ,  $\beta_s$ , is the climate season effect,  $\beta_{ts}$  is the period  $t$  effect at climate season  $s$ , and  $\beta_k$  is the age group effect.

In the spatial model, the regional random effects  $b_i$  is incorporated into the linear predicted, thus,  $\log(\mu_{itsk})$  is defined as:

$$\log(\mu_{itsk}) = \log(n_{itsk}) + \beta_0 + \beta_t + \beta_s + \beta_{ts} + \beta_k + b_i$$

For this spatial structured component, we chose a simple Gaussian intrinsic auto regression.

Thus, the conditional distribution of  $b_i$  is

$$b_i | \mathbf{b}_{-i} \sim N\left(\bar{\mathbf{b}}_i, \sigma_b^2 \mathbf{m}_i\right)$$

where  $\bar{\mathbf{b}}_i$  is the corresponding mean value over the  $m_i$  neighbourhoods that are geographically contiguous to  $i$  and  $\sigma_b^2$  is a spatial variance parameter.

The exponential of the regional random effects ( $e^{b_i}$ ) is the neighbourhood-specific adjusted relative risk.

The spatial+ non structured model, is that which includes the regional random effects prior to  $b_i$ , and other regional random effects without spatial structure,  $\theta_i$ . It is assumed that

$\theta_i \sim N(0, \sigma_\theta^2)$  where  $\sigma_\theta^2$  is the non-structured variance. Thus,  $\log(\mu_{itsk})$  is defined as:

$$\mathbf{log}(\boldsymbol{\mu}_{it\text{sk}}) = \mathbf{log}(\mathbf{n}_{it\text{sk}}) + \beta_0 + \beta_t + \beta_s + \beta_{ts} + \beta_k + \mathbf{b}_i + \theta_i$$

Finally, in the spatial-seasonal model, the regional random effect is nested within climate season. This effect is written as  $\mathbf{b}_i^{(s)}$ . That is,  $\mathbf{b}_i^{(s)}$  is a random effect for the  $i$ th region in climate season  $s$ .

For this spatial structured component, we also chose a simple Gaussian intrinsic auto regression. Thus, the conditional distribution of  $\mathbf{b}_i^{(s)}$  is

$$\mathbf{b}_i^{(s)} | \mathbf{b}_{-i}^{(s)} \sim \mathbf{N} \left( \bar{\mathbf{b}}_i^{(s)}, \sigma_{\mathbf{b}^{(s)}}^2 \mathbf{m}_i \right)$$

where  $\bar{\mathbf{b}}_i^{(s)}$  is the corresponding mean value for the climate season  $s$  over the  $m_i$  neighbourhoods that are geographically contiguous to  $i$  and  $\sigma_{\mathbf{b}^{(s)}}^2$  is a spatial variance parameter for the climate season  $s$ . In this situation  $\mathbf{log}(\boldsymbol{\mu}_{it\text{sk}})$  is defined as:

$$\mathbf{log}(\boldsymbol{\mu}_{it\text{sk}}) = \mathbf{log}(\mathbf{n}_{it\text{sk}}) + \beta_0 + \beta_t + \beta_s + \beta_{ts} + \beta_k + \mathbf{b}_i^{(s)}$$
